# Supplementary material for: Variation in readmission and mortality following hospitalisation with a diagnosis of heart failure: prospective cohort study using linked data
Source: BMC Health Serv Res. 2017 Mar 21;17:220. doi: 10.1186/s12913-017-2152-0 (PMC5359909; doi:10.1186/s12913-017-2152-0)
Supplement: Additional file 2: Table S2. — Multilevel model results for combined 30-day unplanned readmission/mortality: random effect measures and adjusted odds ratios (95% CIs) for individual-level and hospital-level variables. (XLSX 15 kb) [file 12913_2017_2152_MOESM2_ESM.xlsx]

## Sheet: Sheet1
Supplementary Table 2. Multi-level model results for combined 30-day unplanned readmission/mortality: random effect measures and adjusted odds ratios (95% CIs) for individual-level and hospital-level variables
Model	1	2	3	4	5
Random effects
Hospital variance	0.17	0.18	0.17	0.16	0.16
ICC	0.0302	0.0307	0.0276	0.0266	0.0264
P-value	0.04	0.04	0.06	0.07	0.07
MOR	1.49	1.49	1.47	1.47	1.47
PCV (%)		-0.86	5.14	1.93	0.37
Fixed effects	Odds ratios
Sociodemographic
Age (years, at index admission)
45-<75		1	1	1	1
75-<85		1.15	1.14	1.1	1.1
		(0.97,1.36)	(0.96,1.35)	(0.92,1.31)	(0.92,1.31)
≥85		1.18	1.14	1.07	1.07
		(0.99,1.42)	(0.95,1.37)	(0.88,1.31)	(0.88,1.31)
Sex
Male		1.19	1.25	1.2	1.2
		(1.04,1.36)	(1.08,1.44)	(1.03,1.40)	(1.03,1.40)
Female		1	1	1	1
Marital Status
Married			0.87	0.88	0.88
			(0.75,1.00)	(0.76,1.02)	(0.76,1.02)
Not married			1	1	1
Region of residence
Major cities			1	1	1
Regional			0.98	1.01	0.99
			(0.83,1.15)	(0.85,1.19)	(0.84,1.17)
Remote			1.06	1.11	1
			(0.88,1.29)	(0.92,1.34)	(0.80,1.25)
Education
No school certificate			1	1	1
School/trade/certificate/diploma			1.06	1.08	1.09
			(0.90,1.25)	(0.91,1.28)	(0.92,1.29)
Tertiary degree			0.92	0.92	0.94
			(0.70,1.20)	(0.70,1.20)	(0.72,1.23)
Private health insurance
Yes			0.93	0.96	1.01
			(0.81,1.07)	(0.83,1.11)	(0.87,1.17)
No			1	1	1
Baseline health (self-reported)
Duke Social Support Index				0.95	0.95
				(0.91,1.00)	(0.91,1.00)
BMI
Underweight (15-<18kg/m2)				1.2	1.19
				(0.79,1.81)	(0.79,1.81)
Normal (18-<25 kg/m2)				1	1
Overweight (25-<30 kg/m2)				0.97	0.96
				(0.82,1.14)	(0.81,1.14)
Obese (>30-50 kg/m2)				0.77	0.76
				(0.63,0.93)	(0.62,0.92)
Smoking status
Current smoker				1	1
Ex-smoker				0.75	0.76
				(0.56,1.00)	(0.56,1.02)
Never smoker				0.76	0.77
				(0.56,1.03)	(0.57,1.04)
Hospitalisation history (APDC, prior 6 years)
Previous CVD
Yes				1.24	1.26
				(0.95,1.61)	(0.96,1.64)
No				1	1
Previous heart failure
Yes				1.11	1.1
				(0.94,1.31)	(0.93,1.30)
No				1	1
Previous renal disease
Yes				1.06	1.06
				(0.85,1.32)	(0.85,1.32)
No				1	1
Previous anaemia
Yes				1.39	1.39
				(1.17,1.65)	(1.17,1.66)
No				1	1
Previous dementia
Yes				0.88	0.88
				(0.51,1.52)	(0.51,1.53)
No				1	1
Index admission characteristics
Primary diagnosis
Yes				0.87	0.86
				(0.76,1.00)	(0.75,0.99)
No				1	1
Current comorbidity (Charlson Index)
None				1	1
Mild-moderate				1.23	1.23
				(1.05,1.44)	(1.05,1.43)
Severe				1.4	1.41
				(1.15,1.70)	(1.16,1.71)
Hospital Characteristics
Hospital peer group
Principal referral					1
Major city					0.91
					(0.71,1.18)
District					1.05
					(0.82,1.34)
Community					1.28
					(0.94,1.73)
Private					0.77
					(0.60,0.98)
Others					0.73
					(0.49,1.09)
Heart failure service
Yes					1.02
					(0.84,1.22)
No					1
ICC= intraclass correlation coefficient; MOR=median odds ratio; PCV=proportional change in variance
